# Supplementary material for: Positional Obstructive Sleep Apnea and Periodic Limb Movements During Sleep: A Large Multicenter Study
Source: PubMed Central journal article supplement — Clin Exp Otorhinolaryngol. 2024 May 2;17(3):217–25. doi: 10.21053/ceo.2024.00034 (PMC11375175; doi:10.21053/ceo.2024.00034), 2024-05-02
Supplement: ceo-2024-00034-Supplementary-Table-1.pdf [file ceo-2024-00034-Supplementary-Table-1.pdf]

Supplementary Table 1. Risk of periodic limb movements during sleep according to each parameter

| Parameter | OR (95% CI) <sup>a)</sup> | P-value              |
|-----------|---------------------------|----------------------|
| Age       | 1.069 (1.061–1.076)       | <0.001               |
| BMI       | 0.961 (0.936–0.986)       | 0.003                |
| TST       | 1.000 (0.999–1.002)       | 0.726                |
| Male      | -                         | <0.001 <sup>b)</sup> |

OR, odds ratio; CI, confidence index; BMI, body mass index; TST, total sleep time.

<sup>a)</sup>Odds ratio were adjusted for the other parameters including the severity of obstructive sleep apnea. <sup>b)</sup>Chi-square test was used.
