# Supplementary material for: Positional Obstructive Sleep Apnea and Periodic Limb Movements During Sleep: A Large Multicenter Study
Source: PubMed Central journal article supplement — Clin Exp Otorhinolaryngol. 2024 May 2;17(3):217–25. doi: 10.21053/ceo.2024.00034 (PMC11375175; doi:10.21053/ceo.2024.00034), 2024-05-02
Supplement: ceo-2024-00034-Supplementary-Table-3.pdf [file ceo-2024-00034-Supplementary-Table-3.pdf]

**Supplementary Table 3.** Relationship between periodic limb movement during sleep and the severity of obstructive sleep apnea

| Variable | Total | Mild OSA   | Moderate OSA | Severe OSA   | P-value |
|----------|-------|------------|--------------|--------------|---------|
| PLMS     | 473   | 111 (23.5) | 138 (29.2)   | 224 (47.3)   | <0.001  |
| Non-PLMS | 4,602 | 763 (16.6) | 1,068 (23.2) | 2,771 (60.2) | <0.001  |

Values are presented as number (%).

OSA, obstructive sleep apnea; PLMS, periodic limb movements during sleep.

Chi-square test was used.
