# Supplementary material for: Positional Obstructive Sleep Apnea and Periodic Limb Movements During Sleep: A Large Multicenter Study
Source: PubMed Central journal article supplement — Clin Exp Otorhinolaryngol. 2024 May 2;17(3):217–25. doi: 10.21053/ceo.2024.00034 (PMC11375175; doi:10.21053/ceo.2024.00034), 2024-05-02
Supplement: ceo-2024-00034-Supplementary-Table-4.pdf [file ceo-2024-00034-Supplementary-Table-4.pdf]

**Supplementary Table 4.** Relationship between periodic limb movement during sleep and the prevalence of positional obstructive sleep apnea

| Variable | Total | POSA         | Non-POSA     | P-value |
|----------|-------|--------------|--------------|---------|
| PLMS     | 473   | 392 (82.9)   | 81 (17.1)    | <0.001  |
| Non-PLMS | 4,602 | 3,165 (68.8) | 1,437 (31.2) | <0.001  |

Values are presented as number (%).

POSA, positional obstructive sleep apnea; PLMS, periodic limb movements during sleep.

Chi-square test was used.
